# Supplementary material
Source: PubMed Central journal article supplement (PMC3856714)
Supplement: Supp_Table1.pdf [file Supp_Table1.pdf]

## Supplementary Data

SUPPLEMENTARY TABLE S1. EXOGLYCOSIDASE DIGESTIONS OF ENDO- $\beta$ -N-ACETYLGLUCOSAMINIDASE H RELEASED N-GLYCANS DERIVED FROM UNDIFFERENTIATED AND ADIPOGENICALLY DIFFERENTIATED BONE MARROW MESENCHYMAL STEM CELLS

| Found N-glycan structures |             |                                                                                       | Cell type |         |          | Consecutive enzymatic digestions |    |    |    |
|---------------------------|-------------|---------------------------------------------------------------------------------------|-----------|---------|----------|----------------------------------|----|----|----|
| <i>m/z</i>                | Composition | Proposed structure                                                                    | MSC       | A day 5 | A day 15 | N                                | G4 | H  | M  |
| 926.4                     | H3N1        |      | x         | x       | x        | ud                               | ud | ud | ud |
| 1130.5                    | H4N1        |      | x         | x       | x        | ud                               | ud | ud | ud |
| 1334.6                    | H5N1        |      | x         | x       | x        | ud                               | ud | ud | d  |
| 1538.7                    | H6N1        |      | x         | x       | x        | ud                               | ud | ud | d  |
| 1579.7                    | H5N2        |      | x         | x       | x        | ud                               | d  | d  | d  |
| 1742.8                    | H7N1        |      | x         | x       | x        | ud                               | ud | ud | d  |
| 1783.8                    | H6N2        |      | x         | x       | x        | ud                               | d  | d  | d  |
| 1940.9                    | S1H5N2      |      | x         | x       | x        | d                                | d  | d  | d  |
| 1946.9                    | H8N1        | 2x  | x         | x       | x        | ud                               | ud | ud | d  |
| 2145.0                    | S1H6N2      |    | x         | x       | x        | d                                | d  | d  | d  |
| 2151.0                    | H9N1        |    | x         | x       | x        | ud                               | ud | ud | d  |
| 2355.1                    | H10N1       |    | x         | x       | x        | ud                               | ud | ud | d  |

x denotes the presence of a peak in the MALDI-TOF mass spectra of the corresponding N-glycome of MSCs or adipogenically differentiated MSCs (A) day 5 and 15 of differentiation.

N, *Arthrobacter ureafaciens* neuraminidase; G4,  $\beta$ (1-4) galactosidase from *Streptococcus pneumoniae*; H,  $\beta$ -N-acetylhexosaminidase recombinant from *Streptococcus pneumoniae*, expressed in *Escherichia coli*; M,  $\alpha$ Mannosidase from *Canavalia ensiformis*; d, digested; ud, undigested; H, hexose; N, N-acetylhexosamine; S, N-acetylneuraminic acid; MALDI-TOF, matrix-assisted laser desorption-ionization-time of flight mass spectrometry; MSCs, mesenchymal stem cells.
