# Supplementary material
Source: PubMed Central journal article supplement (PMC3856714)
Supplement: Supp_Table2.pdf [file Supp_Table2.pdf]

SUPPLEMENTARY TABLE S2. EXOGLYCOSIDASE DIGESTIONS OF PEPTIDE-N4-(N-ACETYL- $\beta$ -GLUCOSAMINYL) ASPARAGINE AMIDASE F-RELEASED N-GLYCANS DERIVED FROM UNDIFFERENTIATED AND ADIPOGENICALLY DIFFERENTIATED BONE MARROW MESENCHYMAL STEM CELLS

| <i>m/z</i> | <i>Found N-glycan structures</i> |                           | <i>Cell type</i> |                |                 | <i>Consecutive enzymatic digestions</i> |          |          |          |
|------------|----------------------------------|---------------------------|------------------|----------------|-----------------|-----------------------------------------|----------|----------|----------|
|            | <i>Composition</i>               | <i>Proposed structure</i> | <i>MSC</i>       | <i>A day 5</i> | <i>A day 15</i> | <i>N</i>                                | <i>G</i> | <i>H</i> | <i>F</i> |
| 1171.6     | H3N2                             |                           | X                | x              | x               | ud                                      | ud       | ud       | ud       |
| 1334.6     | H5N1                             |                           | X                | x              | x               | ud                                      | ud       | ud       | ud       |
| 1345.6     | H3N2F1                           |                           | X                | x              | x               | ud                                      | ud       | ud       | d        |
| 1375.6     | H4N2                             |                           | X                | x              | x               | ud                                      | ud       | ud       | ud       |
| 1416.7     | H3N3                             |                           | X                | x              | x               | ud                                      | ud       | d        | ud       |
| 1538.7     | H6N1                             |                           | X                | x              | x               | ud                                      | ud       | ud       | ud       |
| 1579.7     | H5N2                             |                           | X                | x              | x               | ud                                      | ud       | ud       | ud       |
| 1590.8     | H3N3F1                           |                           | X                | x              | x               | ud                                      | ud       | d        | d        |
| 1620.8     | H4N3                             |                           | X                | x              | x               | ud                                      | d        | d        | ud       |
| 1742.8     | H7N1                             |                           | X                | x              | x               | ud                                      | ud       | ud       | ud       |
| 1783.8     | H6N2                             |                           | X                | x              | x               | ud                                      | ud       | ud       | ud       |
| 1794.9     | H4N3F1                           |                           | X                | x              | x               | ud                                      | d        | d        | d        |
| 1824.9     | H5N3                             |                           | X                | x              | x               | ud                                      | d        | d        | ud       |
| 1835.9     | H3N4F1                           |                           | X                | x              | x               | ud                                      | ud       | d        | d        |
| 1865.9     | H4N4                             |                           | X                | x              | x               | ud                                      | ud       | d        | ud       |
| 1940.9     | S1H5N2                           |                           | X                | x              | x               | d                                       | d        | d        | ud       |
| 1946.9     | H8N1                             |                           | X                | x              | x               | ud                                      | ud       | ud       | ud       |
| 1981.9     | S1H4N3                           |                           | X                | x              | x               | d                                       | d        | d        | ud       |
| 1999.0     | H5N3F1                           |                           | X                | x              | x               | ud                                      | d        | d        | d        |
| 2040.0     | H4N4F1                           |                           | X                | x              | x               | ud                                      | d        | d        | d        |

(continued)

SUPPLEMENTARY TABLE S2. (CONTINUED)

| <i>m/z</i> | <i>Found N-glycan structures</i> |                           | <i>Cell type</i> |                |                 | <i>Consecutive enzymatic digestions</i> |          |          |          |
|------------|----------------------------------|---------------------------|------------------|----------------|-----------------|-----------------------------------------|----------|----------|----------|
|            | <i>Composition</i>               | <i>Proposed structure</i> | <i>MSC</i>       | <i>A day 5</i> | <i>A day 15</i> | <i>N</i>                                | <i>G</i> | <i>H</i> | <i>F</i> |
| 2070.0     | H5N4                             |                           | X                | x              | x               | ud                                      | d        | d        | ud       |
| 2145.0     | S1H6N2                           |                           | X                | x              | x               | d                                       | d        | d        | ud       |
| 2151.0     | H9N1                             |                           | X                | x              | x               | ud                                      | ud       | ud       | ud       |
| 2156.0     | S1H4N3F1                         |                           | X                | x              | x               | d                                       | d        | d        | d        |
| 2186.0     | S1H5N3                           |                           | X                | x              | x               | d                                       | d        | d        | ud       |
| 2227.1     | S1H4N4                           |                           | X                | x              | x               | d                                       | d        | d        | ud       |
| 2244.1     | H5N4F1                           |                           | X                | x              | x               | ud                                      | d        | d        | d        |
| 2274.1     | H6N4                             |                           | X                | x              | x               | ud                                      | d        | d        | ud       |
| 2360.1     | S1H5N3F1                         |                           | X                | x              | x               | d                                       | d        | d        | d        |
| 2390.1     | S1H6N3                           |                           | X                | x              | x               | d                                       | d        | d        | ud       |
| 2401.1     | S1H4N4F1                         |                           | X                | x              | x               | d                                       | d        | d        | d        |
| 2431.2     | S1H5N4                           |                           | X                | x              | x               | d                                       | d        | d        | ud       |
| 2461.2     | G1H5N4                           |                           | X                | x              | x               | d                                       | d        | d        | ud       |
| 2489.2     | H5N5F1                           |                           | X                | x              | x               | ud                                      | d        | d        | d        |
| 2519.2     | H6N5                             |                           | X                | x              | x               | ud                                      | d        | d        | ud       |
| 2605.3     | S1H5N4F1                         |                           | X                | x              | x               | d                                       | d        | d        | d        |
| 2635.3     | S1H6N4                           |                           | X                | x              | x               | d                                       | d        | d        | d        |
| 2693.3     | H6N5F1                           |                           | X                | x              | x               | ud                                      | d        | d        | d        |
| 2751.3     | S2H6N3                           |                           | X                | x              |                 | d                                       | d        | d        | ud       |
| 2792.3     | S2H5N4                           |                           | X                | x              | x               | d                                       | d        | d        | ud       |

(continued)

SUPPLEMENTARY TABLE S2. (CONTINUED)

| Found N-glycan structures |                    |                                                                                        | Cell type  |                |                 | Consecutive enzymatic digestions |          |          |          |
|---------------------------|--------------------|----------------------------------------------------------------------------------------|------------|----------------|-----------------|----------------------------------|----------|----------|----------|
| <i>m/z</i>                | <i>Composition</i> | <i>Proposed structure</i>                                                              | <i>MSC</i> | <i>A day 5</i> | <i>A day 15</i> | <i>N</i>                         | <i>G</i> | <i>H</i> | <i>F</i> |
| 2850.4                    | S1H5N5F1           | 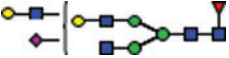      | X          | x              | x               | d                                | d        | d        | d        |
| 2880.4                    | S1H6N5             |       | X          | x              | x               | d                                | d        | d        | ud       |
| 2966.4                    | S2H5N4F1           |       | X          | x              | x               | d                                | d        | d        | d        |
| 2996.4                    | S2H6N4             | 2x    | X          | x              | x               | d                                | d        | d        | d        |
| 3054.5                    | S1H6N5F1           |       | X          | x              | x               | d                                | d        | d        | d        |
| 3084.5                    | H7N5S1             |       | X          | x              | x               | d                                | d        | d        | d        |
| 3142.5                    | H7N6F1             |       | X          | x              | x               | ud                               | d        | d        | d        |
| 3329.6                    | S1H7N6             |       | X          | x              | x               | d                                | d        | d        | ud       |
| 3415.7                    | S2H6N5F1           | 2x   | X          | x              | x               | d                                | d        | d        | d        |
| 3445.7                    | S2H7N5             | 2x  | X          | x              | x               | d                                | d        | d        | d        |
| 3503.7                    | S1H7N6F1           |     | X          | x              | x               | d                                | d        | d        | d        |
| 3602.7                    | S3H6N5             |     | X          | x              | x               | d                                | d        | d        | ud       |
| 3690.8                    | S2H7N6             | 2x  | X          | x              | x               | d                                | d        | d        | ud       |
| 3776.8                    | S3H6N5F1           |     | X          | x              | x               | d                                | d        | d        | d        |
| 3806.8                    | S3H7N5             | 3x  | X          | x              | x               | d                                | d        | d        | d        |
| 3864.9                    | S2H7N6F1           | 2x  | X          | x              | x               | d                                | d        | d        | d        |
| 3894.9                    | S2H8N6             | 2x  | X          | x              |                 | d                                | d        | d        | d        |

(continued)

SUPPLEMENTARY TABLE S2. (CONTINUED)

| <i>m/z</i> | Found <i>N</i> -glycan structures |                    | Cell type |                |                 | Consecutive enzymatic digestions |          |          |          |
|------------|-----------------------------------|--------------------|-----------|----------------|-----------------|----------------------------------|----------|----------|----------|
|            | Composition                       | Proposed structure | MSC       | <i>A day 5</i> | <i>A day 15</i> | <i>N</i>                         | <i>G</i> | <i>H</i> | <i>F</i> |
| 3964.9     | S4H6N5                            |                    |           | x              | x               | d                                | d        | d        | ud       |
| 4052.0     | S3H7N6                            |                    | X         |                |                 | d                                | d        | d        | ud       |
| 4226.1     | S3H7N6F1                          |                    | X         | x              | x               | d                                | d        | d        | d        |
| 4587.3     | S4H7N6F1                          |                    | X         | x              | x               | d                                | D        | d        | d        |

x denotes the presence of a peak in the MALDI-TOF mass spectra of the corresponding *N*-glycome of MSCs or adipogenically differentiated MSCs (*A*) day 5 and 15 of differentiation. Note that some low abundant structures were not observed in the mass spectrum after exoglycosidase digestion and were therefore, not listed here.

*N*, *Arthrobacter ureafaciens* neuraminidase; *G*, bovine testes  $\beta$ -galactosidase; *H*,  $\beta$ -*N*-acetylhexosaminidase recombinant from *Streptococcus pneumoniae*, expressed in *Escherichia coli*; *F*, bovine kidney  $\alpha$ (1-2,3,4,6) fucosidase; d, digested; ud, undigested; H, hexose; N, *N*-acetylhexosamine; F, deoxyhexose; S, *N*-acetylneuraminic acid.
